# Supplementary material for: Transcriptome Meta-Analysis Confirms the Hidradenitis Suppurativa Pathogenic Triad: Upregulated Inflammation, Altered Epithelial Organization, and Dysregulated Metabolic Signaling
Source: MDPI journal article supplement (doi:10.3390/biom12101371), 2022-09-25
Supplement: s1 [file s1]

## Supplementary Data

Although the Set Analysis is a less powerful analysis than the meta-analysis, we conducted it to evaluate common genes between all independent studies. DEGs found in this analysis could be constantly associated with HS lesion formation, and it may provide important insights for a better understanding of HS pathogenesis. Moreover, since the meta-analysis resulted in over 3,000 mDEGs, a shorter number provided by saDEGs and cDEGs could help in easing the understanding of this complex disease.

### Materials and Methods

#### *Set Analysis*

The lists of DEGs from each study resulting from the previous steps were compared by Set Analysis. Using structured query language (SQL), we created a cross-reference DEGs table containing all the common genes found in the set analysis (saDEGs) of the studies. The Set Analysis, and their corresponding Venn diagrams were generated with the VennDiagram package for R software version 4.1.0.

#### *Pathway Analysis*

We performed a pathway analysis with the saDEGs. We searched the REACTOME database, using ReactomePA package [24] for R software, and PANTHER v17.0 [29,30]. Results with FDR-adjusted enrichment test  $p$ -value  $< 0.05$  were considered significant.

### Results

The Set Analysis resulted in 232 saDEGs prevailing in HS lesions (Table S1 and Figure S3), of which 219 were upregulated and 13 were downregulated. To note, all these genes were also observed in the mDEGs. Therefore, these saDEGs resulting from the intersection of all studies were retrieved in both analyses (cDEGs). Moreover, the reactome pathway analysis of these 232 cDEGs revealed 37 enriched pathways with an FDR value  $< 0.05$ , of which 20 were upregulated and 16, downregulated (Table S2). Overall, the results of upregulated pathways were congruent with what was seen in the meta-analysis findings. In fact, 16 of the pathways found by the reactome in the Set Analysis were also noticed in the meta-analysis. Some of the enriched upregulated pathways found were immune system, ECM organization and degradation, peptide ligand-binding receptors, collagen formation and degradation, and class A/1 (Rhodopsin-like receptors). On the other hand, pathways related to general cellular metabolism were downregulated. We then analyzed the upregulated cDEGs with the PANTHER pathway database. The results are summarized in Figure S4. Pathways associated with B cell activation, integrin signaling, inflammation mediated by chemokine and cytokine signaling, and integrin signaling were the pathways hit with the highest percentage of genes. No hits of the down-regulated cDEGs were found by the PANTHER Pathway tool.

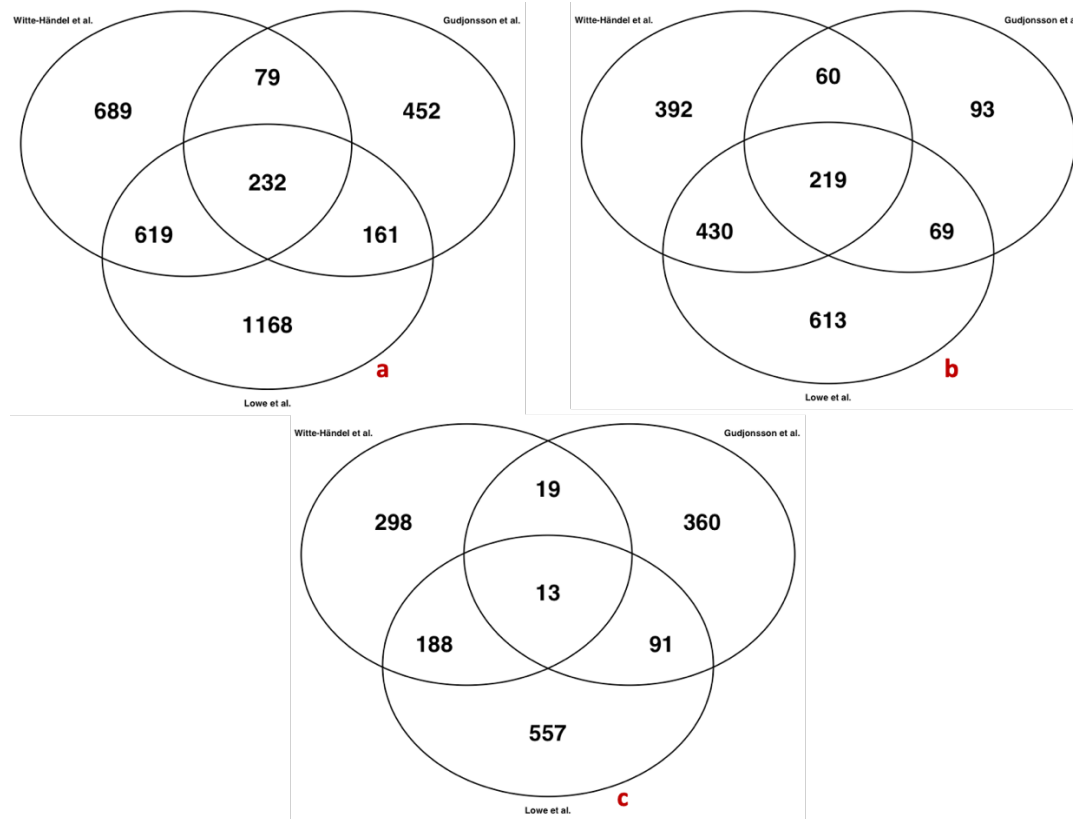

**Figure S3.** Venn Diagram analysis representing saDEGs found in the individual studies. a saDEGs of the included studies; b upregulated saDEGs. c downregulated saDEGs.

**Table S4.** Enriched pathways associated with saDEGs, and therefore cDEGs, filtered by FDR < 0.05 found in the set analysis. Among the upregulated cDEGs, 91 genes had major roles in immunological pathways. For instance, 34 genes such as *CYBB* (p-value =  $1.758 \times 10^{-20}$ , logfc = 3.1303), *CD3E* (p value =  $2.421 \times 10^{-15}$ , logfc = 2.6583), *CD8A* (p value = 3.734, logfc = 2.2508), *CD19* (p value =  $2.485 \times 10^{-30}$ , logfc = 5.5543) were associated with adaptive immune response and their cellular signaling networks, while 44 genes, including Matrix Metalloproteinases (MMPs) family genes, *DEFB4* (p value =  $2.278 \times 10^{-58}$ , logfc = 7.6490), *TLR8* (p value =  $3,003 \times 10^{-19}$ , logfc = 2.8510), *BIN2* (p value =  $2.563 \times 10^{-13}$ , logfc = 2.4414), were linked with innate immune system. In other important pathways such as extracellular matrix organization, 23 genes like *ADAM12* (p value =  $1.492 \times 10^{-22}$ , logfc = 4.1200), *ADAMTS2* (p value = 2.6091, logfc =  $1.111 \times 10^{-14}$ ) and *COL3A1* (p value =  $1.433 \times 10^{-17}$ , logfc = 2.7178), were found. On the other hand, down-regulated cDEGs such as *FA2H* (p value =  $5.394 \times 10^{-20}$ , logfc = -3.7949), *FADS2* (p value =  $1.073 \times 10^{-24}$ , logfc = -4.61), *GUCY2EP* (p value = 5.673, logfc = -1.9362), *HSD3B1* (p value =  $4.861 \times 10^{-30}$ , logfc = -5.2634), *IYD* (p value =  $1.337 \times 10^{-20}$ , logfc = -2.4972), *MOGAT2* (p value =  $1.59 \times 10^{-23}$ , logfc = -3.7538), *MPPED1* (p value =  $1.519 \times 10^{-25}$ , logfc = -3.1882), *PNPLA5* (p value =  $3.314 \times 10^{-29}$ , logfc = -4.2126), *SOX9-AS1* (p value =  $8.702 \times 10^{-17}$ , logfc = -2,3383), *THRSP* (p value =  $4.101 \times 10^{-48}$ , logfc = -5.4498), play a crucial role in metabolic pathways. In particular, *FA2H*, *FADS2*, *MOGAT2*, *HSD3B1*, *THRSP*, *PNPLA5* are important for the metabolism of lipids while *IYD* participates in thyroxine biosynthesis and metabolism of amine-derived hormones.

| Pathway identifier | Pathway name  | Pathway also found in by the meta-analysis | Entities found | saDEGs | FDR                    |
|--------------------|---------------|--------------------------------------------|----------------|--------|------------------------|
| R-HSA-168256       | Immune System | No                                         | 91             | Up     | $7.37 \times 10^{-09}$ |

|               |                                                                          |     |    |      |                        |
|---------------|--------------------------------------------------------------------------|-----|----|------|------------------------|
| R-HSA-380108  | Chemokine receptors bind chemokines                                      | Yes | 13 | Up   | 7.37x10 <sup>-09</sup> |
| R-HSA-198933  | Immunoregulatory interactions between a Lymphoid and a non-Lymphoid cell | Yes | 25 | Up   | 5.48x10 <sup>-08</sup> |
| R-HSA-1474244 | Extracellular matrix organization                                        | Yes | 23 | Up   | 2.01x10 <sup>-06</sup> |
| R-HSA-8949275 | RUNX3 Regulates Immune Response and Cell Migration                       | No  | 6  | Up   | 2.12x10 <sup>-06</sup> |
| R-HSA-6783783 | Interleukin-10 signaling                                                 | Yes | 11 | Up   | 2.57x10 <sup>-05</sup> |
| R-HSA-375276  | Peptide ligand-binding receptors                                         | Yes | 16 | Up   | 3.60x10 <sup>-05</sup> |
| R-HSA-1474228 | Degradation of the extracellular matrix                                  | Yes | 13 | Up   | 1.10x10 <sup>-04</sup> |
| R-HSA-1442490 | Collagen degradation                                                     | Yes | 9  | Up   | 1.64x10 <sup>-04</sup> |
| R-HSA-449147  | Signaling by Interleukins                                                | Yes | 28 | Up   | 3.11x10 <sup>-04</sup> |
| R-HSA-1474290 | Collagen formation                                                       | Yes | 10 | Up   | 5.49x10 <sup>-04</sup> |
| R-HSA-2022090 | Assembly of collagen fibrils and other multimeric structures             | Yes | 8  | Up   | 7.33x10 <sup>-04</sup> |
| R-HSA-168249  | Innate Immune System                                                     | No  | 44 | Up   | 7.33x10 <sup>-04</sup> |
| R-HSA-1592389 | Activation of Matrix Metalloproteinases                                  | Yes | 6  | Up   | 9.57x10 <sup>-04</sup> |
| R-HSA-6798695 | Neutrophil degranulation                                                 | Yes | 21 | Up   | 0.00260791             |
| R-HSA-373076  | Class A/1 (Rhodopsin-like receptors)                                     | Yes | 19 | Up   | 0.00272173             |
| R-HSA-216083  | Integrin cell surface interactions                                       | Yes | 8  | Up   | 0.00306491             |
| R-HSA-1280218 | Adaptive Immune System                                                   | No  | 34 | Up   | 0.00306491             |
| R-HSA-8939245 | RUNX1 regulates transcription of genes involved in BCR signaling         | No  | 3  | Up   | 0.00487645             |
| R-HSA-1280215 | Cytokine Signaling in Immune system                                      | No  | 34 | Up   | 0.01218292             |
| R-HSA-556833  | Metabolism of lipids                                                     | No  | 6  | Down | 0.00202704             |
| R-HSA-8979227 | Triglyceride metabolism                                                  | No  | 2  | Down | 0.0087015              |
| R-HSA-1430728 | Metabolism                                                               | No  | 7  | Down | 0.01607597             |
| R-HSA-193993  | Mineralocorticoid biosynthesis                                           | No  | 1  | Down | 0.01607597             |
| R-HSA-2046105 | Linoleic acid (LA) metabolism                                            | No  | 1  | Down | 0.01607597             |

|               |                                                                |     |   |      |            |
|---------------|----------------------------------------------------------------|-----|---|------|------------|
| R-HSA-194002  | Glucocorticoid biosynthesis                                    | No  | 1 | Down | 0.01607597 |
| R-HSA-209968  | Thyroxine biosynthesis                                         | No  | 1 | Down | 0.01607597 |
| R-HSA-193048  | Androgen biosynthesis                                          | No  | 1 | Down | 0.01607597 |
| R-HSA-2046104 | alpha-linolenic (omega3) and linoleic (omega6) acid metabolism | No  | 1 | Down | 0.01607597 |
| R-HSA-2046106 | alpha-linolenic acid (ALA) metabolism                          | No  | 1 | Down | 0.01607597 |
| R-HSA-200425  | Carnitine metabolism                                           | No  | 1 | Down | 0.01607597 |
| R-HSA-75109   | Triglyceride biosynthesis                                      | No  | 1 | Down | 0.01607597 |
| R-HSA-8978868 | Fatty acid metabolism                                          | Yes | 2 | Down | 0.01761335 |
| R-HSA-209776  | Metabolism of amine-derived hormones                           | Yes | 1 | Down | 0.02062509 |
| R-HSA-163560  | Triglyceride catabolism                                        | No  | 1 | Down | 0.02741238 |
| R-HSA-196071  | Metabolism of steroid hormones                                 | No  | 1 | Down | 0.0397431  |

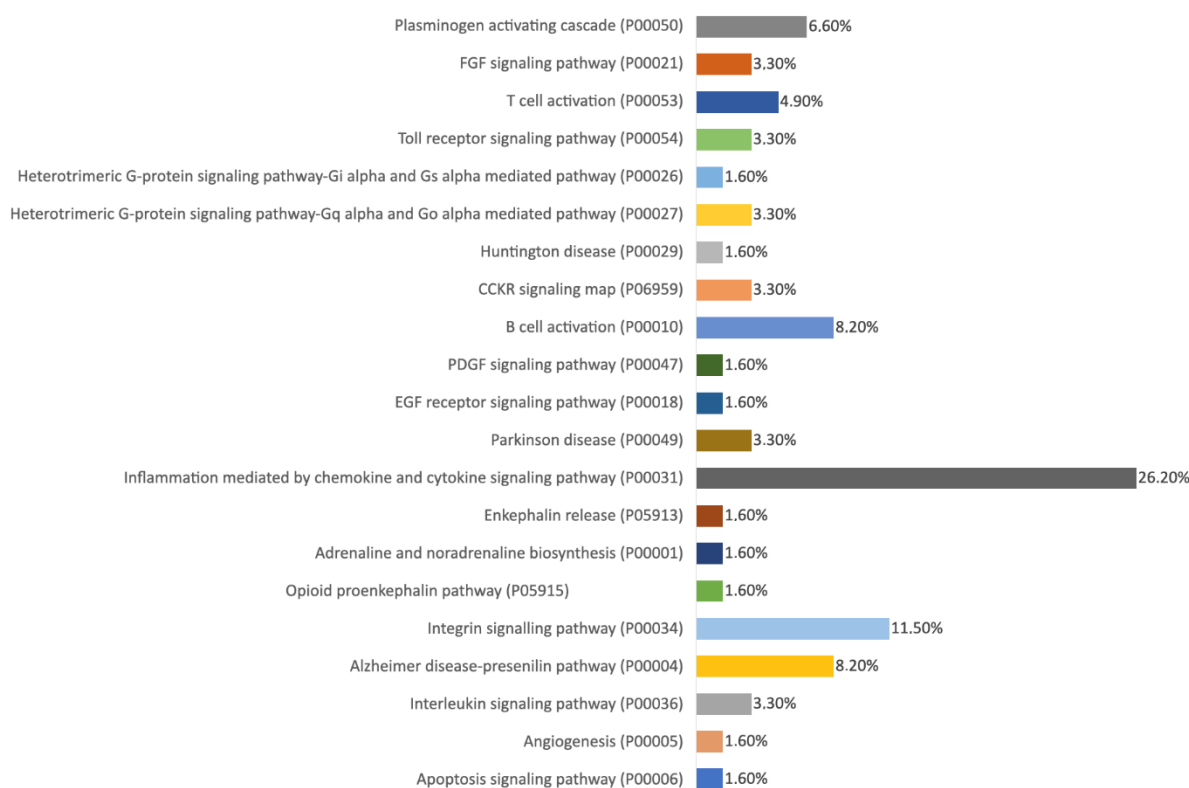

**Figure S4.** Percent of upregulated gene hits against total pathway hits.
