# Supplementary material for: Transcriptome Meta-Analysis Confirms the Hidradenitis Suppurativa Pathogenic Triad: Upregulated Inflammation, Altered Epithelial Organization, and Dysregulated Metabolic Signaling
Source: MDPI journal article supplement (doi:10.3390/biom12101371), 2022-09-25
Supplement: s1 [file s1]

**Table S4.** Enriched pathways associated with saDEGs, and therefore cDEGs, filtered by FDR < 0.05 found in the set analysis. Among the upregulated cDEGs, 91 genes had major roles in immunological pathways. For instance, 34 genes such as *CYBB* (p-value =  $1.758 \times 10^{-20}$ , logfc = 3.1303), *CD3E* (p value =  $2.421 \times 10^{-15}$ , logfc = 2.6583), *CD8A* (p value = 3.734, logfc = 2.2508), *CD19* (p value =  $2.485 \times 10^{-30}$ , logfc = 5.5543) were associated with adaptive immune response and their cellular signaling networks, while 44 genes, including Matrix Metalloproteinases (MMPs) family genes, *DEFB4* (p value =  $2.278 \times 10^{-58}$ , logfc = 7.6490), *TLR8* (p value =  $3,003 \times 10^{-19}$ , logfc = 2.8510), *BIN2* (p value =  $2.563 \times 10^{-13}$ , logfc = 2.4414), were linked with innate immune system. In other important pathways such as extracellular matrix organization, 23 genes like *ADAM12* (p value =  $1.492 \times 10^{-22}$ , logfc = 4.1200), *ADAMTS2* (p value = 2.6091, logfc =  $1.111 \times 10^{-14}$ ) and *COL3A1* (p value =  $1.433 \times 10^{-17}$ , logfc = 2.7178), were found. On the other hand, down-regulated cDEGs such as *FA2H* (p value =  $5.394 \times 10^{-20}$ , logfc = -3.7949), *FADS2* (p value =  $1.073 \times 10^{-24}$ , logfc = -4.61), *GUCY2EP* (p value = 5.673, logfc = -1.9362), *HSD3B1* (p value =  $4.861 \times 10^{-30}$ , logfc = -5.2634), *IYD* (p value =  $1.337 \times 10^{-20}$ , logfc = -2.4972), *MOGAT2* (p value =  $1.59 \times 10^{-23}$ , logfc = -3.7538), *MPPED1* (p value =  $1.519 \times 10^{-25}$ , logfc = -3.1882), *PNPLA5* (p value =  $3.314 \times 10^{-29}$ , logfc = -4.2126), *SOX9-AS1* (p value =  $8.702 \times 10^{-17}$ , logfc = -2,3383), *THRSP* (p value =  $4.101 \times 10^{-48}$ , logfc = -5.4498), play a crucial role in metabolic pathways. In particular, *FA2H*, *FADS2*, *MOGAT2*, *HSD3B1*, *THRSP*, *PNPLA5* are important for the metabolism of lipids while *IYD* participates in thyroxine biosynthesis and metabolism of amine-derived hormones.

| Pathway identifier | Pathway name                                                             | Pathway also found in the meta-analysis | Entities found | saDEGs | FDR                    |
|--------------------|--------------------------------------------------------------------------|-----------------------------------------|----------------|--------|------------------------|
| R-HSA-168256       | Immune System                                                            | No                                      | 91             | Up     | $7.37 \times 10^{-09}$ |
| R-HSA-380108       | Chemokine receptors bind chemokines                                      | Yes                                     | 13             | Up     | $7.37 \times 10^{-09}$ |
| R-HSA-198933       | Immunoregulatory interactions between a Lymphoid and a non-Lymphoid cell | Yes                                     | 25             | Up     | $5.48 \times 10^{-08}$ |
| R-HSA-1474244      | Extracellular matrix organization                                        | Yes                                     | 23             | Up     | $2.01 \times 10^{-06}$ |
| R-HSA-8949275      | RUNX3 Regulates Immune Response and Cell Migration                       | No                                      | 6              | Up     | $2.12 \times 10^{-06}$ |
| R-HSA-6783783      | Interleukin-10 signaling                                                 | Yes                                     | 11             | Up     | $2.57 \times 10^{-05}$ |

|               |                                                                  |     |    |      |                        |
|---------------|------------------------------------------------------------------|-----|----|------|------------------------|
| R-HSA-375276  | Peptide ligand-binding receptors                                 | Yes | 16 | Up   | 3.60x10 <sup>-05</sup> |
| R-HSA-1474228 | Degradation of the extracellular matrix                          | Yes | 13 | Up   | 1.10x10 <sup>-04</sup> |
| R-HSA-1442490 | Collagen degradation                                             | Yes | 9  | Up   | 1.64x10 <sup>-04</sup> |
| R-HSA-449147  | Signaling by Interleukins                                        | Yes | 28 | Up   | 3.11x10 <sup>-04</sup> |
| R-HSA-1474290 | Collagen formation                                               | Yes | 10 | Up   | 5.49x10 <sup>-04</sup> |
| R-HSA-2022090 | Assembly of collagen fibrils and other multimeric structures     | Yes | 8  | Up   | 7.33x10 <sup>-04</sup> |
| R-HSA-168249  | Innate Immune System                                             | No  | 44 | Up   | 7.33x10 <sup>-04</sup> |
| R-HSA-1592389 | Activation of Matrix Metalloproteinases                          | Yes | 6  | Up   | 9.57x10 <sup>-04</sup> |
| R-HSA-6798695 | Neutrophil degranulation                                         | Yes | 21 | Up   | 0.00260791             |
| R-HSA-373076  | Class A/1 (Rhodopsin-like receptors)                             | Yes | 19 | Up   | 0.00272173             |
| R-HSA-216083  | Integrin cell surface interactions                               | Yes | 8  | Up   | 0.00306491             |
| R-HSA-1280218 | Adaptive Immune System                                           | No  | 34 | Up   | 0.00306491             |
| R-HSA-8939245 | RUNX1 regulates transcription of genes involved in BCR signaling | No  | 3  | Up   | 0.00487645             |
| R-HSA-1280215 | Cytokine Signaling in Immune system                              | No  | 34 | Up   | 0.01218292             |
| R-HSA-556833  | Metabolism of lipids                                             | No  | 6  | Down | 0.00202704             |
| R-HSA-8979227 | Triglyceride metabolism                                          | No  | 2  | Down | 0.0087015              |
| R-HSA-1430728 | Metabolism                                                       | No  | 7  | Down | 0.01607597             |

|               |                                                                |     |   |      |            |
|---------------|----------------------------------------------------------------|-----|---|------|------------|
| R-HSA-193993  | Mineralocorticoid biosynthesis                                 | No  | 1 | Down | 0.01607597 |
| R-HSA-2046105 | Linoleic acid (LA) metabolism                                  | No  | 1 | Down | 0.01607597 |
| R-HSA-194002  | Glucocorticoid biosynthesis                                    | No  | 1 | Down | 0.01607597 |
| R-HSA-209968  | Thyroxine biosynthesis                                         | No  | 1 | Down | 0.01607597 |
| R-HSA-193048  | Androgen biosynthesis                                          | No  | 1 | Down | 0.01607597 |
| R-HSA-2046104 | alpha-linolenic (omega3) and linoleic (omega6) acid metabolism | No  | 1 | Down | 0.01607597 |
| R-HSA-2046106 | alpha-linolenic acid (ALA) metabolism                          | No  | 1 | Down | 0.01607597 |
| R-HSA-200425  | Carnitine metabolism                                           | No  | 1 | Down | 0.01607597 |
| R-HSA-75109   | Triglyceride biosynthesis                                      | No  | 1 | Down | 0.01607597 |
| R-HSA-8978868 | Fatty acid metabolism                                          | Yes | 2 | Down | 0.01761335 |
| R-HSA-209776  | Metabolism of amine-derived hormones                           | Yes | 1 | Down | 0.02062509 |
| R-HSA-163560  | Triglyceride catabolism                                        | No  | 1 | Down | 0.02741238 |
| R-HSA-196071  | Metabolism of steroid hormones                                 | No  | 1 | Down | 0.0397431  |
